# Supplementary material for: An ultrasensitive narrowband organic phototransistor for solar-blind ultraviolet detection and imaging
Source: Royal Society of Chemistry journal article supplement (doi:10.1039/d4tc03641g), 2024-11-05
Supplement: d4tc03641g1.pdf [file d4tc03641g1.pdf]

## Supporting Information

### Ultrasensitive Narrowband Organic Phototransistor for Solar-Blind Ultraviolet Detection and Imaging

Jianing Wang,<sup>a</sup> Yuanhong Gao,<sup>b</sup> Minming Yan,<sup>b</sup> Xiwei Zheng,<sup>b</sup> Meili Xu,<sup>b</sup> Hong Chen,<sup>b</sup> Lingqiang Meng,<sup>b\*</sup> Wei Huang,<sup>a\*</sup> and Hong Meng,<sup>a, b\*</sup>

<sup>a</sup>Frontiers Science Center for Flexible Electronics Institute of Flexible Electronics Northwestern Polytechnical University Xian 710072, P. R. China

<sup>b</sup>School of Advanced Materials, Peking University Shenzhen Graduate School, Peking University, Shenzhen, P. R. China

Email: menglingqiang@pku.edu.cn, iamwhuang@nwpu.edu.cn, menghong@pku.edu.cn

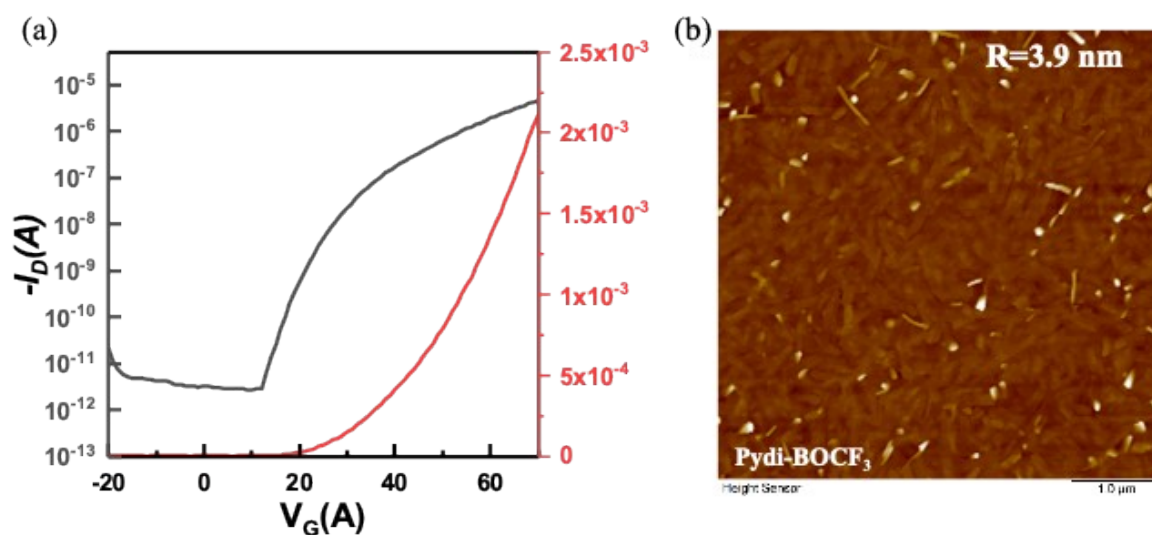

**Figure S1.** (a) The transfer characteristics curve of PyDI-BOCF<sub>3</sub> and (b) AFM analysis of the film.

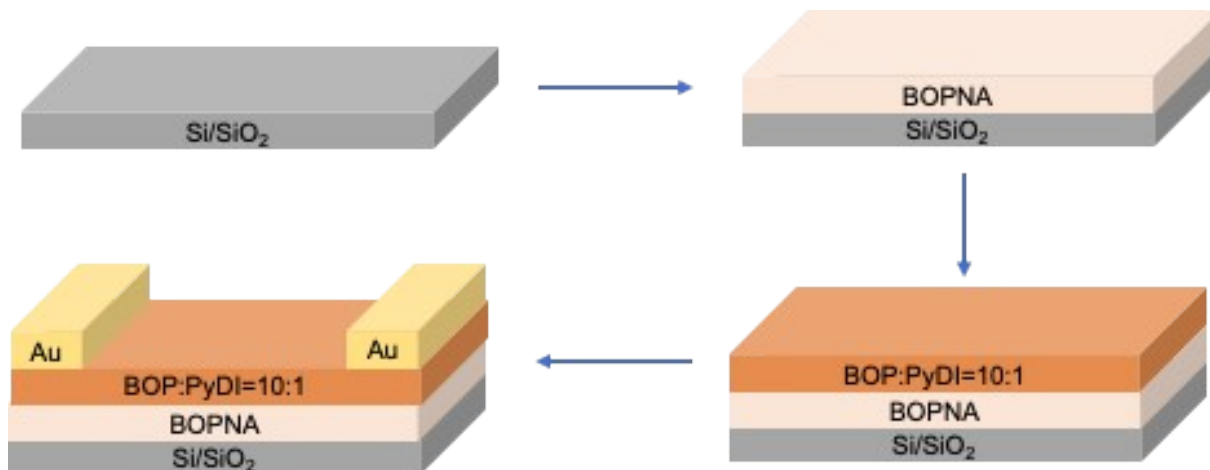

**Figure S2.** Fabrication process of the hybrid-layered OPT pixel as described in the experimental section.

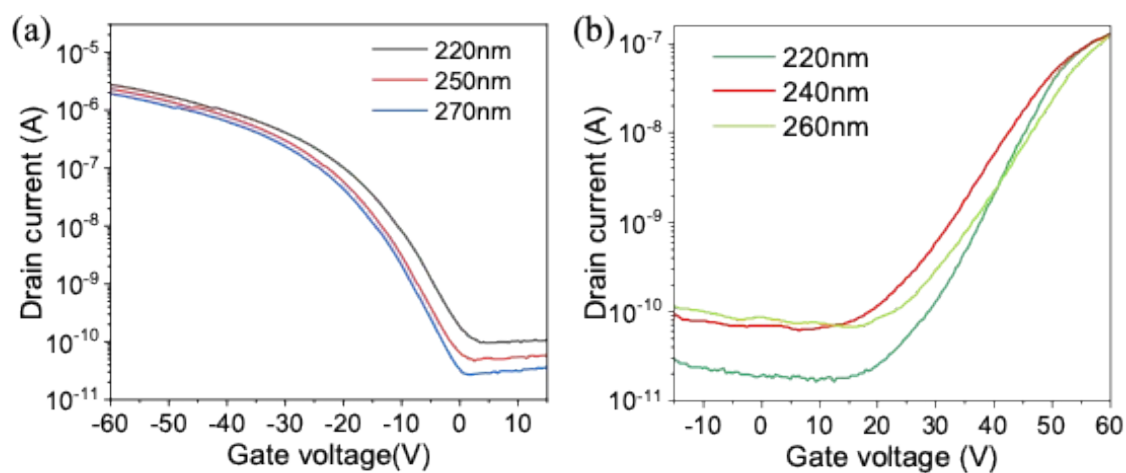

**Figure S3.** The photoreponse tests of (a) single-layer BOPNA devices and (b) single-layer PyDI-BOCF3 devices at 220 nm, 250 nm, and 270 nm under 50  $\mu$ W intensity.

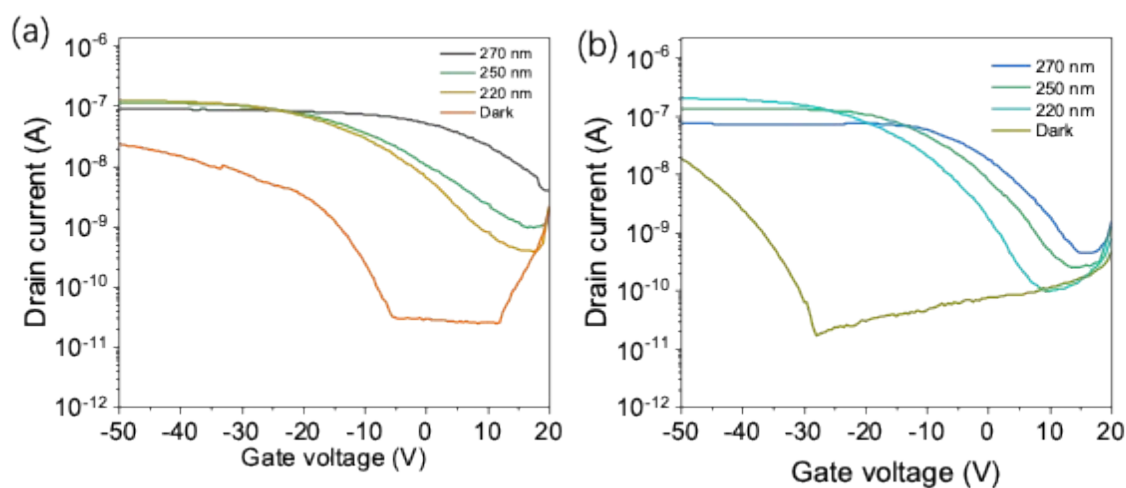

**Figure S4.** The dark current and photocurrent at 220 nm, 250 nm, and 270 nm under 50  $\mu\text{W}$  intensity for mixed heterojunctions with different ratios: (a) BOPNA:PyDI-BOCF3 = 50:1 and (b) BOPNA:PyDI-BOCF3 = 100:1.

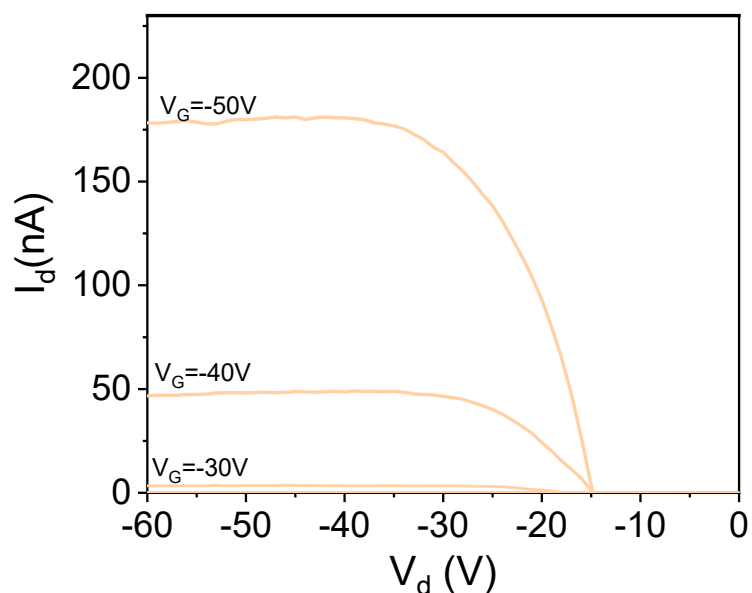

**Figure S5.** The output curves of SBUV HLPT.

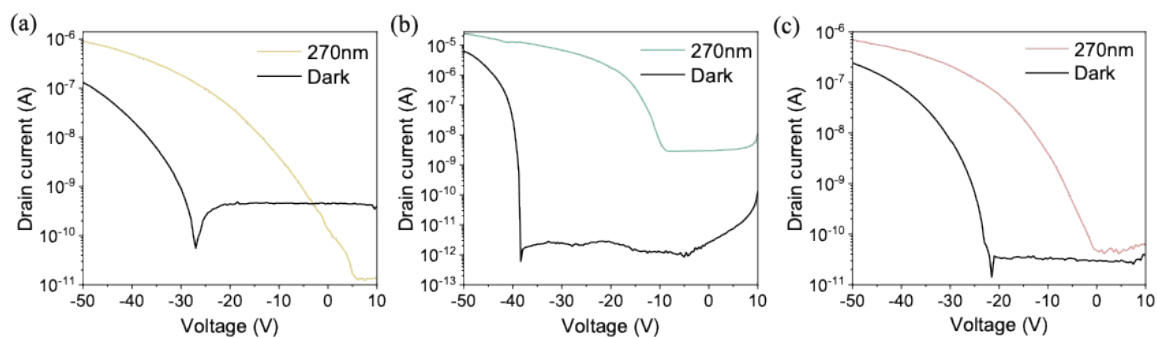

**Figure S6.** (a) Illumination power-dependent photoresponse characteristics of the HL-OPT. (b) The photocurrent response of HL-OPT to light ranging from 200 nm to 400 nm Under an illumination intensity of 50  $\mu\text{W}$ .

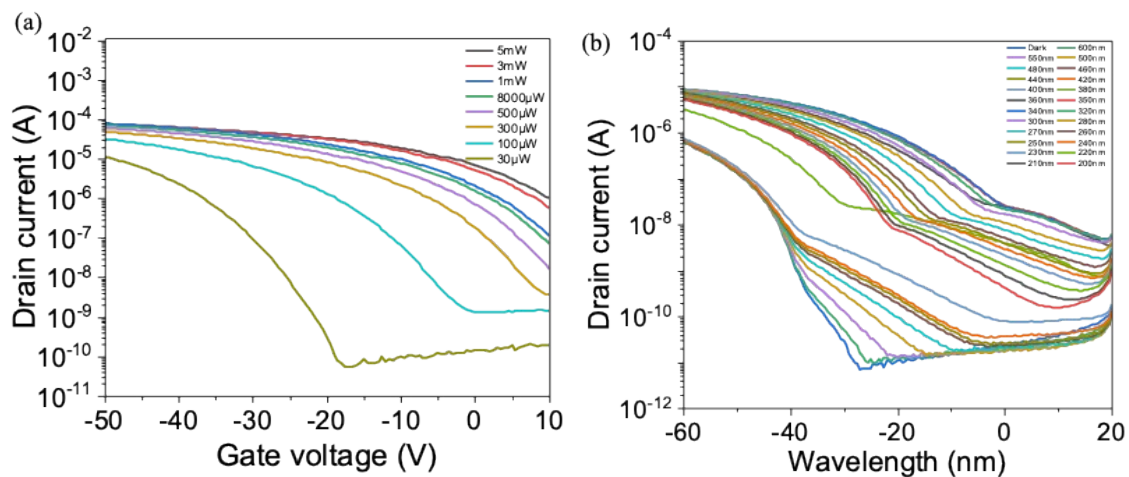

**Figure S7.** (a) Illumination power-dependent photoresponse characteristics of the HL-OPT. (b) The photocurrent response of HL-OPT to light ranging from 200 nm to 400 nm Under an illumination intensity of 50  $\mu$ W.
